# Supplementary material for: Cardiac and Peripheral Autonomic Responses to Orthostatic Stress During Transcutaneous Vagus Nerve Stimulation in Healthy Subjects
Source: PubMed Central journal article supplement (PMC6517949; doi:10.3390/jcm8040496), 2019-04-11
Supplement: jcm-08-00496-s001.pdf [file jcm-08-00496-s001.pdf]

**Table S1.** Baseline measures of spectral parameters calculated by linear method using autoregressive model

|                                          | <b>Rest_Control</b><br>(n=13) | <b>Rest_tVNS off</b><br>(n=13) | <b>P</b> |
|------------------------------------------|-------------------------------|--------------------------------|----------|
| <b><i>R-R interval</i></b>               |                               |                                |          |
| HR (beats/min)                           | 67 [60 – 72]                  | 66 [61 – 68]                   | 0.25     |
| Variance (ms <sup>2</sup> )              | 1690 [1336 – 3725]            | 2572 [1494 – 4291]             | 0.24     |
| VLF abs. (ms <sup>2</sup> )              | 758 [490 – 1262]              | 1146 [580 – 1475]              | 0.30     |
| LF n.u. (%)                              | 46 [30 – 66]                  | 41 [19 – 62]                   | 0.21     |
| HF n.u. (%)                              | 49 [33 – 67]                  | 57 [35 – 71]                   | 0.21     |
| LF/HF                                    | 1.0 [0.5 – 2.1]               | 0.7 [0.3 – 1.9]                | 0.23     |
| <b><i>Systolic Arterial Pressure</i></b> |                               |                                |          |
| Variance (mmHg <sup>2</sup> )            | 20 [13 – 30]                  | 19 [8 – 27]                    | 0.26     |
| LF abs. (mmHg <sup>2</sup> )             | 1.8 [0.6 – 4.1]               | 1.0 [0.6 – 2.2]                | 0.28     |
| <b><i>Respiratory Rate</i></b>           |                               |                                |          |
| ω HF (Hz)                                | 0.31 [0.24 – 0.33]            | 0.29 [0.20 – 0.33]             | 0.40     |
| HF n.u. (%)                              | 94 [85 – 96]                  | 93 [89 – 96]                   | 0.95     |

Median [25<sup>th</sup>-75<sup>th</sup>]; tVNS = transcutaneous vagal nerve stimulation. VLF = very low frequency; LF = low frequency; HF = high frequency; LF/HF = sympathovagal balance; n.u. = normalized unit.

**Table S2.** Baseline measures of dynamics patterns calculated by nonlinear method using symbolic analysis

|                            | <b>Rest_Control</b><br>(n=13) | <b>Rest_tVNS off</b><br>(n=13) | <b>P</b> |
|----------------------------|-------------------------------|--------------------------------|----------|
| <b><i>RRi Patterns</i></b> |                               |                                |          |
| 0V (%)                     | 14 [8 – 25]                   | 18 [8 – 27]                    | 0.63     |
| 1V (%)                     | 49 [46 – 54]                  | 45 [44 – 52]                   | 0.18     |
| 2LV (%)                    | 11 [8 – 19]                   | 11 [7 – 22]                    | 0.84     |
| 2UV (%)                    | 21 [11 – 26]                  | 21 [11 – 32]                   | 0.75     |
| <b><i>SAP Patterns</i></b> |                               |                                |          |
| 0V (%)                     | 35 [21 – 44]                  | 36 [14 – 47]                   | 0.58     |

Median [25<sup>th</sup>-75<sup>th</sup>]. tVNS = transcutaneous vagal nerve stimulation; RRi= R-R interval; SAP = systolic arterial pressure.

**Table S3.** Baseline measures of transfer function calculated by bivariate autoregressive model

|                              | <b>Rest_Control<br/>(n=13)</b> | <b>Rest_tVNS off<br/>(n=13)</b> | <b><i>P</i></b> |
|------------------------------|--------------------------------|---------------------------------|-----------------|
| <b><i>RESP-RRi</i></b>       |                                |                                 |                 |
| $K^2_{LF}$ (%)               | 14 [1 – 29]                    | 27 [19 – 38]                    | 0.41            |
| $K^2_{HF}$ (%)               | 96 [92 – 97]                   | 93 [88 – 98]                    | 0.02            |
| <b><i>SAP-RRi</i></b>        |                                |                                 |                 |
| Gain <sub>LF</sub> (ms/mmHg) | 14 [8 – 18]                    | 12 [9 – 27]                     | 0.84            |
| Gain <sub>HF</sub> (ms/mmHg) | 19 [12 – 35]                   | 17 [11 – 36]                    | 0.45            |
| $K^2_{LF}$ (%)               | 62 [48 – 86]                   | 75 [65 – 84]                    | 0.60            |
| $K^2_{HF}$ (%)               | 96 [93 – 98]                   | 96 [89 – 97]                    | 0.91            |

Median [25<sup>th</sup>-75<sup>th</sup>]. tVNS = transcutaneous vagal nerve stimulation; RRi= R-R interval; RESP = respiration; SAP = systolic arterial pressure; LF = low frequency; HF = high frequency;  $K^2$  = coherence.
